# Supplementary material for: Synergy of highly dispersed Pd and the oxygen-vacancy-promoted hydrodeoxygenation of lactic acid to propionic acid
Source: Royal Society of Chemistry journal article supplement (doi:10.1039/d3nj02457a), 2023-01-01
Supplement: d3nj02457a1.pdf [file d3nj02457a1.pdf]

**Synergy of highly dispersed Pd and oxygen vacancy promoted hydrodeoxygenation of lactic acid to propionic acid**

Mei Zhao,<sup>a</sup> Congming Tang,<sup>a</sup> Kai Ma,<sup>b</sup> and Xinli Li<sup>a\*</sup>

(<sup>1</sup>School of Chemistry and Chemical Engineering, Chongqing University of Technology, Chongqing 400054, PR China; <sup>2</sup>Synthetic Lubricants Research Institute of Sinopec Lubricant Co., Ltd., Chongqing 400039, PR China)

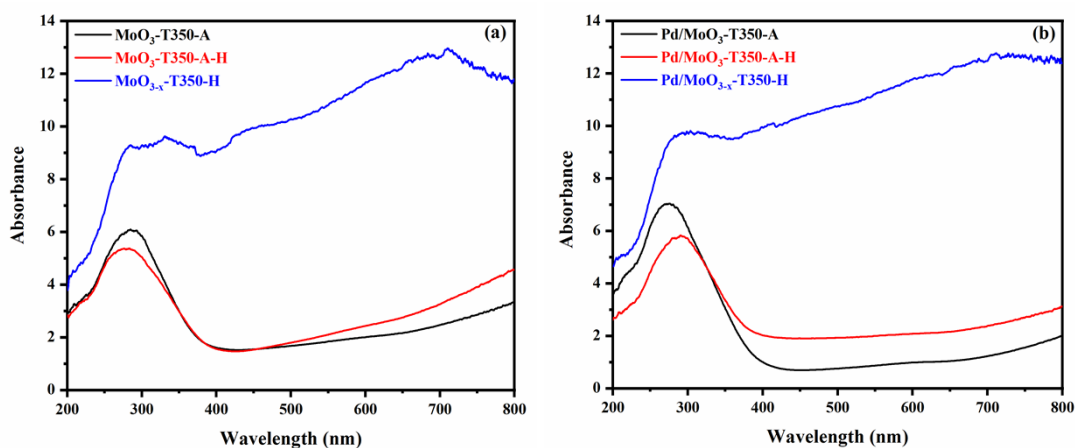

**Figure S1.** UV-visible absorption spectra of MoO<sub>3</sub> supports (a) and corresponding Pd/MoO<sub>3</sub> catalysts (b).

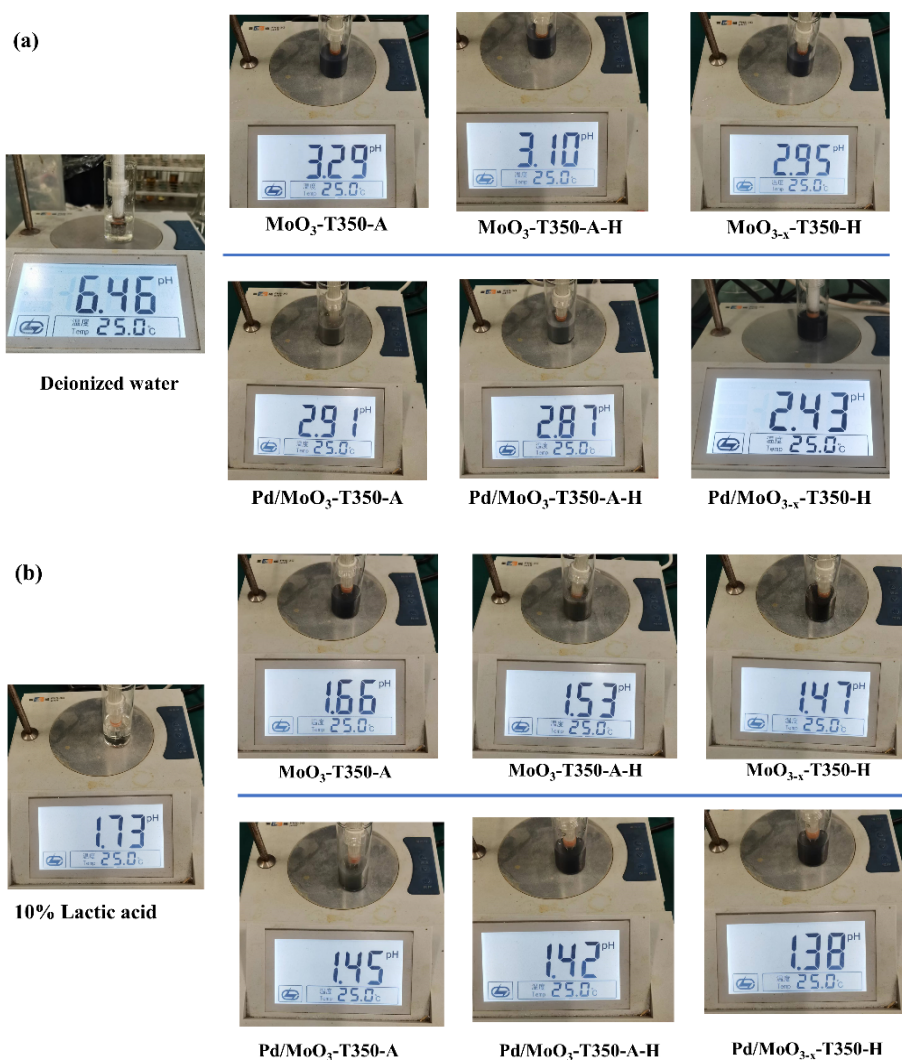

**Fig. S2** pH change of pristine supports (a) and their corresponding supported Pd (b) in deionized water and 10 wt% LA aqueous solution.

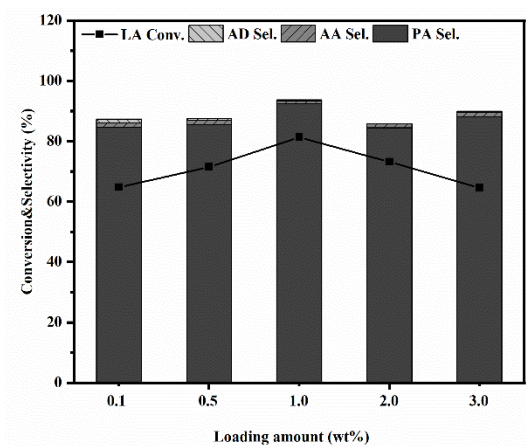

**Figure S3.** Effect of Pd loading amount on catalytic performance

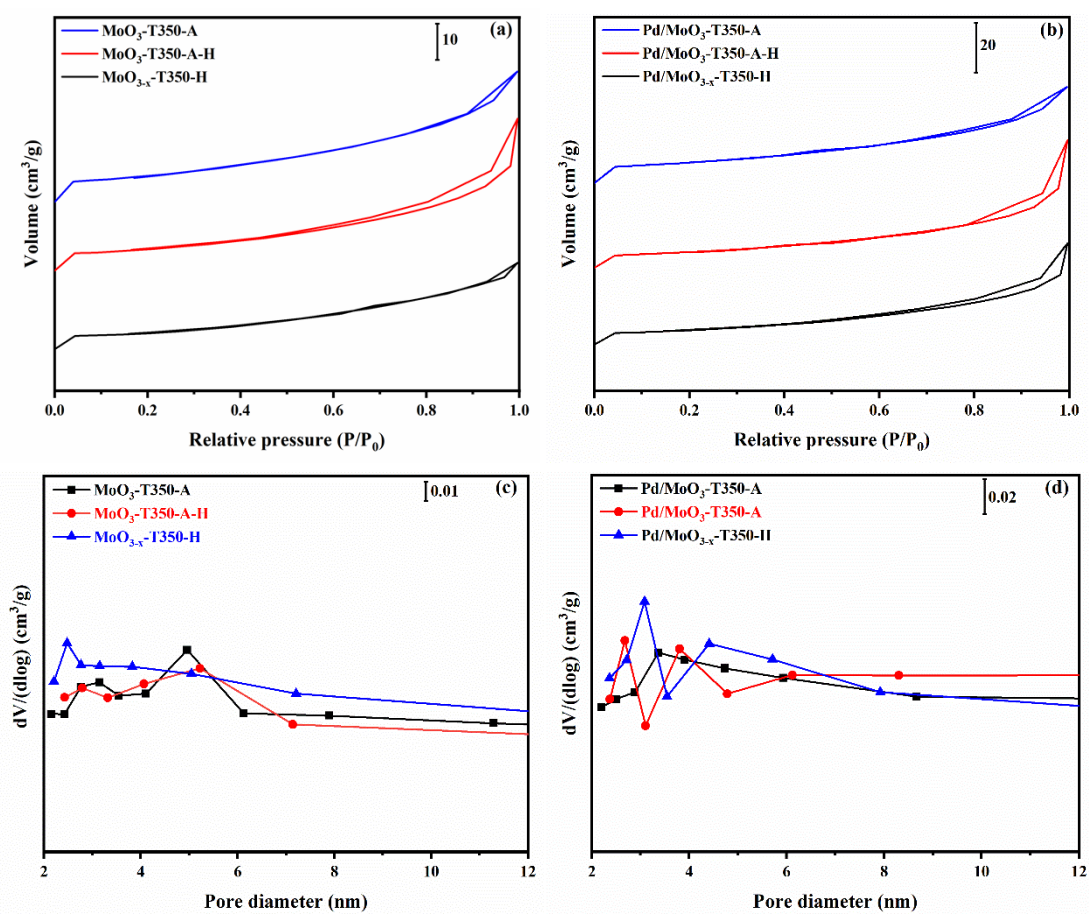

**Figure S4.** Nitrogen adsorption-desorption isotherm of MoO<sub>3</sub> supports (a) and Pd/MoO<sub>3</sub> catalysts (b); Pore size distribution of MoO<sub>3</sub> supports (c) and Pd/MoO<sub>3</sub> catalysts (d).

**Table S1** Energy bands of MoO<sub>3</sub> supports and Pd/MoO<sub>3</sub> catalysts.

| Catalyst                      | E <sub>g</sub> (eV) | E <sub>CB</sub> (eV) | E <sub>VB</sub> (eV) |
|-------------------------------|---------------------|----------------------|----------------------|
| MoO <sub>3</sub> -T350-A      | 3.12                | -0.01                | 3.11                 |
| MoO <sub>3</sub> -T350-A-H    | 2.97                | -0.08                | 2.89                 |
| MoO <sub>3-x</sub> -T350-H    | 2.16                | -0.18                | 1.98                 |
| Pd/MoO <sub>3</sub> -T350-A   | 2.91                | -0.07                | 2.84                 |
| Pd/MoO <sub>3</sub> -T350-A-H | 2.68                | -0.21                | 2.47                 |
| Pd/MoO <sub>3-x</sub> -T350-H | 1.38                | -0.3                 | 1.08                 |

**Table S2.** Comparison of HDO Reactivity in the Conversion of Lactic Acid to Propionic Acid for Pd/MoO<sub>3</sub> catalysts, along with Other HDO Catalysts from the Literature.

| Entry | Catalyst                             | Reaction system | Reaction temp. (°C) | LA Conv. (%) | PA Sel. (%) | Ref.      |
|-------|--------------------------------------|-----------------|---------------------|--------------|-------------|-----------|
| 1     | Pd/MoO <sub>3-x</sub> -T350-H        | heterogeneous   | 215                 | 81.3         | 92.4        | This work |
| 2     | MoO <sub>2</sub> (acac) <sub>2</sub> | homogeneous     | 270                 | 85.0         | 52.0        | 1         |
| 3     | Fe <sub>x</sub> O <sub>y</sub>       | heterogeneous   | 390                 | 96.7         | 46.7        | 2         |
| 4     | Fe <sub>3</sub> O <sub>4</sub>       | heterogeneous   | 390                 | 93.2         | 58.4        | 3         |
| 5     | MoO <sub>2</sub>                     | heterogeneous   | 390                 | 96.8         | 62.8        | 4         |
| 5     | Co-Zn                                | heterogeneous   | 250                 | 88.0         | 66.8        | 5         |
| 6     | NaI                                  | homogeneous     | 220                 | 100          | 99.0        | 6         |
| 7     | SSMoS2                               | heterogeneous   | 215                 | 96.8         | 96.3        | 7         |

**Table S3** Pd Leaching rate in the conversion of lactic acid to propionic acid for Pd/MoO<sub>3-x</sub> tested by ICP-MS.

| Catalyst              | Concentration of Pd in reacted solution (mg/L) | Pd leaching rate (%) |
|-----------------------|------------------------------------------------|----------------------|
| Pd/MoO <sub>3-x</sub> | 0.58                                           | 0.26                 |

Catalysts, 0.5g; LA feedstock: 20 g, 10 wt%, H<sub>2</sub> initial pressure, 3.0 MPa; Reaction temperature, 215°C; reaction time, 12 h.

**Table S4** Effect of the amount of 1,1-Diphenylethylene on the catalytic activity of HDO reactivity in the conversion of lactic acid to propionic acid over Pd/MoO<sub>3-x</sub>.

| 1,1-Diphenylethylene : LA (mol) | Conv. of LA (%) | Sel. of PA (%) |
|---------------------------------|-----------------|----------------|
| 1:1                             | 78.3            | 88.9           |
| 2:1                             | 79.7            | 88.2           |

Catalyst, 0.5 g; LA feedstock, 20 g (5 wt% LA); H<sub>2</sub> initial pressure, 3.0 MPa; Reaction temperature, 215°C; reaction time, 12 h.

## References

1. T. J. Korstanje, H. Kleijn, J. Jastrzebski and R. Gebbink, *Green Chem.*, 2013, **15**, 982-988.
2. X. L. Li, Z. J. Zhai, C. M. Tang, L. W. Sun, Y. Zhang and W. Bai, *RSC Adv.*, 2016, **6**, 62252-62262.
3. Y. Zhang, X. Li, L. Sun and C. Tang, *ChemistrySelect*, 2016, **1**, 5002-5007.
4. X. Li, J. Pang, J. Zhang, C. Yin, W. Zou, C. Tang and L. Dong, *Ind. Eng. Chem. Res.*, 2019, **58**, 101-109.
5. Z. B. Huo, J. F. Xiao, D. Z. Ren, F. M. Jin, T. Wang and G. D. Yao, *Green Chem.*, 2017, **19**, 1308-1314.
6. S. Liu, H. Feng, T. Li, Y. Wang, N. Rong and W. Yang, *Green Chem.*, 2020, **22**, 7468-7475.
7. R. Liu, X. Li, Z. Jia, Y. Wang, Y. Peng, C. Tang, Z. Chen and L. Dong, *ACS Sustain. Chem. Eng.*, 2022, **10**, 5463-5475.
